# Supplementary material for: PET imaging of medulloblastoma with an 18F-labeled tryptophan analogue in a transgenic mouse model
Source: PubMed Central journal article supplement (PMC7051973; doi:10.1038/s41598-020-60728-6), 2020-03-02
Supplement: 41598_2020_60728_MOESM1_ESM.pdf [file 41598_2020_60728_MOESM1_ESM.pdf]

## Supplementary Material

### PET imaging of medulloblastoma with an $^{18}\text{F}$ -labeled tryptophan analogue in a transgenic mouse model

Yangchun Xin<sup>1,\*</sup>, Xuyi Yue<sup>1,\*</sup>, Hua Li<sup>1</sup>, Zhiqin Li<sup>2</sup>, Hancheng Cai<sup>3</sup>, Arabinda K. Choudhary<sup>4</sup>, Shaohui Zhang<sup>1</sup>, Diane C. Chugani<sup>1,5</sup>, and Sigrid A. Langhans<sup>2,#</sup>

<sup>1</sup>Katzin Diagnostic & Research PET/MR Center, Nemours/Alfred I. duPont Hospital for Children, Wilmington, DE 19803, USA; <sup>2</sup>Nemours Center for Childhood Cancer Research, Nemours/Alfred I. duPont Hospital for Children, Wilmington, DE 19803, USA; <sup>3</sup>Mayo Clinic, 4500 San Pablo Road, Jacksonville, FL 32224, USA; <sup>4</sup>Department of Radiology, Nemours/Alfred I. duPont Hospital for Children, Wilmington, DE 19803;

<sup>5</sup>Communication Sciences and Disorders Program, College of Health Sciences, University of Delaware, Newark, DE 19713.

\*These authors contributed equally.

Present address:

AKC – University of Arkansas for Medical Sciences, Little Rock, AR 72205

DCC – University of Delaware, Newark, DE 19713

SZ – Progenics Pharmaceuticals Inc., New York, NY 10007

#### #Corresponding Author:

Sigrid A. Langhans, PhD, Nemours/Alfred I. duPont Hospital for Children, DuPont Experimental Station, Bldg 400, #4414; 200 Powder Mill Road, Wilmington, DE 19803, E-mail: [Sigrid.Langhans@nemours.org](mailto:Sigrid.Langhans@nemours.org), Phone: 302-651-6538, Fax: 302-651-4827

**This file contains Supplementary Figures S1-S4**

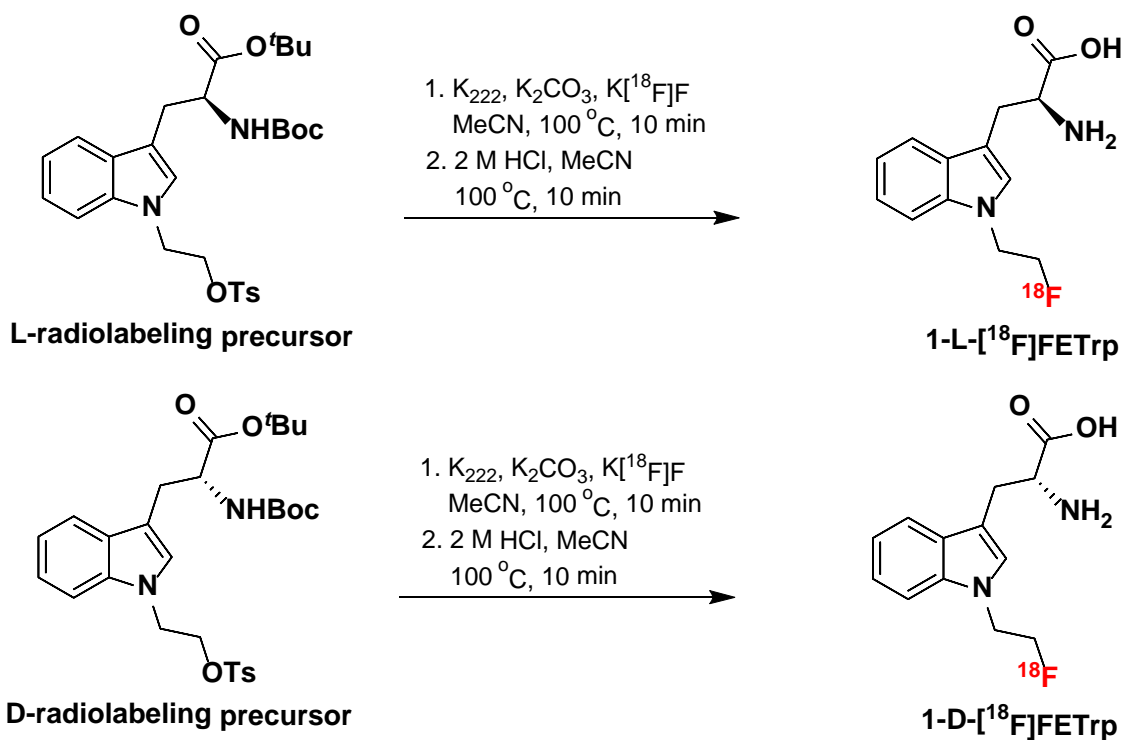

**Figure S1.** Radiolabeling of 1-L-[ $^{18}F$ ]FETrp and 1-D-[ $^{18}F$ ]FETrp.

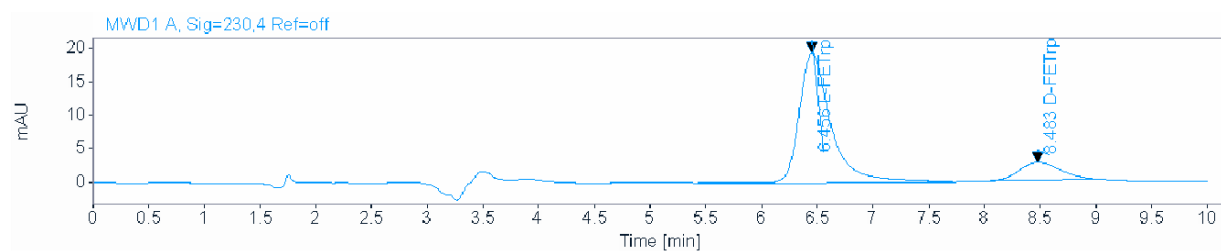

**Figure S2.** Representative analytical HPLC ultraviolet chromatogram of the L-FETrp and D-FETrp nonradioactive mixture. HPLC conditions: Astec CHIROBIOTIC™ T Chiral column (5  $\mu\text{m}$ ,  $250 \times 4.6$  mm), EtOH in water (7/3, v/v), flow rate at 1 mL/min, UV detection wavelength at 230 nm. Retention time: L-FETrp, 6.5 min; D-FETrp, 8.5 min.

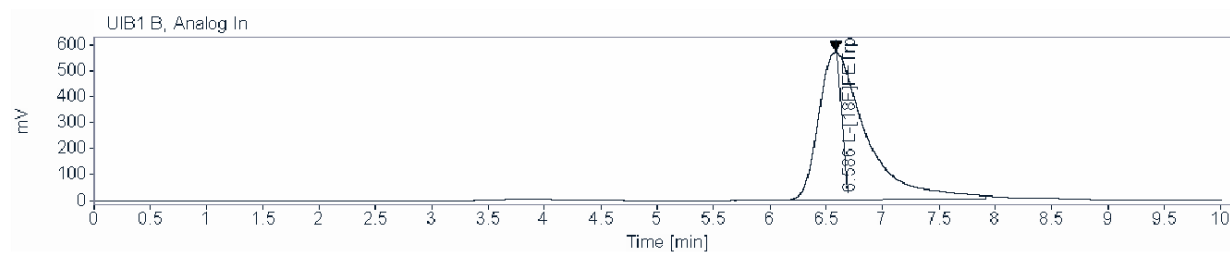

**Figure S3.** Representative analytical HPLC radioactive chromatogram of the purified 1-L- [<sup>18</sup>F]FETrp. HPLC conditions: Astec CHIROBIOTIC™ T Chiral column (5 μm, 250 × 4.6 mm), EtOH in water (7/3, v/v), flow rate at 1 mL/min.

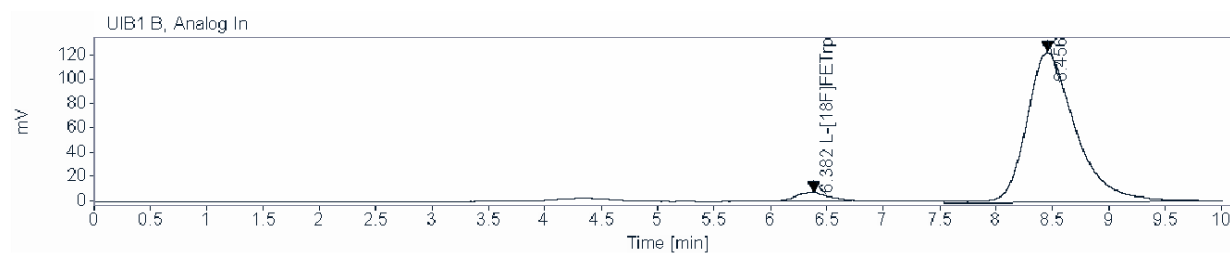

**Figure S4.** Representative analytical HPLC radioactive chromatogram of the purified 1-D- [<sup>18</sup>F]FETrp. HPLC conditions: Astec CHIROBIOTIC™ T Chiral column (5 μm, 250 × 4.6 mm), EtOH in water (7/3, v/v), flow rate at 1 mL/min.
